# Supplementary material
Source: publisher figshare collection journal article supplement (https://acs.figshare.com/ndownloader/files/4149187)
Supplement: Supplementary file 1 [file 4149187]

## Supporting information

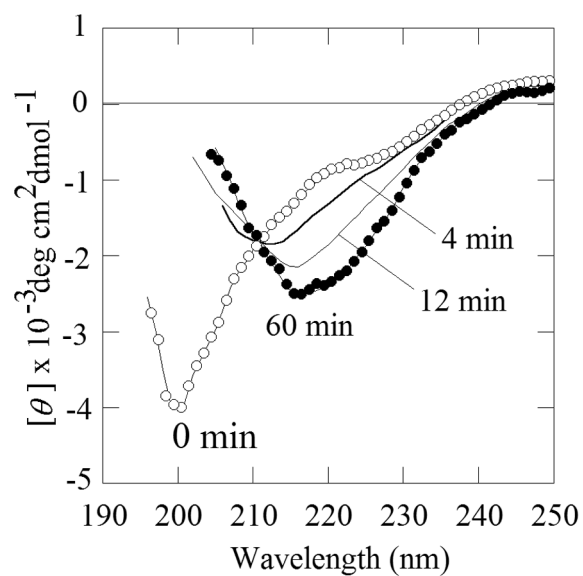

**Figure S1.** Effect of temperature on the secondary structure of  $\alpha$ AC(71-88). Far-UV CD spectra of 500  $\mu\text{g/ml}$   $\alpha$ AC(71-88) in 10 mM sodium phosphate (pH 7.5) with 100 mM NaCl was measured at 48°C.

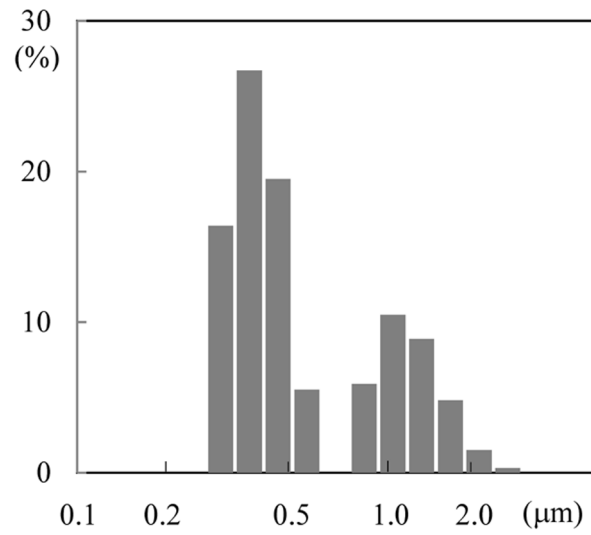

**Figure S2.** The distribution of diameter size of the heat-induced aggregate of ADH obtained by DLS measurement. ADH (150 μg/ml) in 10 mM sodium phosphate (pH 7.5) with 100 mM NaCl was incubated at 44°C for 1 hr.

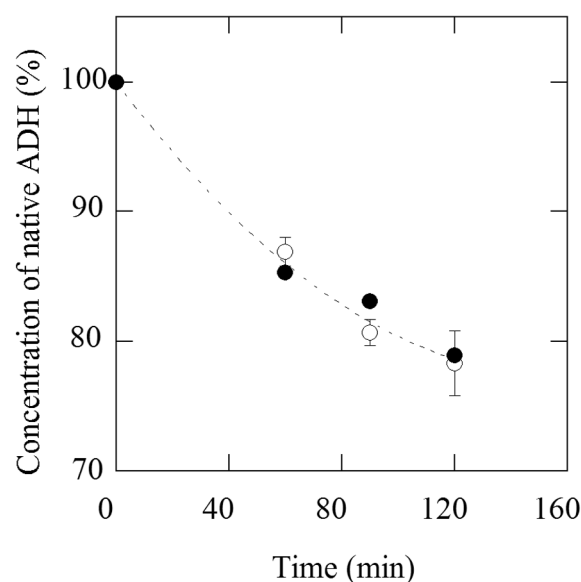

**Figure S3.** Effect of the  $\alpha$ AC(71-88) amyloid fibrils on the concentration change of non-aggregated ADH in the solution incubated at 44 °C. ADH (150  $\mu$ g/ml) in 10 mM sodium phosphate (pH 7.5) with 100 mM NaCl was incubated at 44°C in the presence (○) and absence (●) of the  $\alpha$ AC(71-88) amyloid (10  $\mu$ g/ml). The mixture was incubated for a given time and then centrifuged at 12,000  $g$  to remove the ADH aggregates. The absence ADH aggregate in the supernatant was confirmed by gel filtration chromatography. The concentration of non-aggregated ADH in the supernatant was then determined from the  $A_{280}$ .

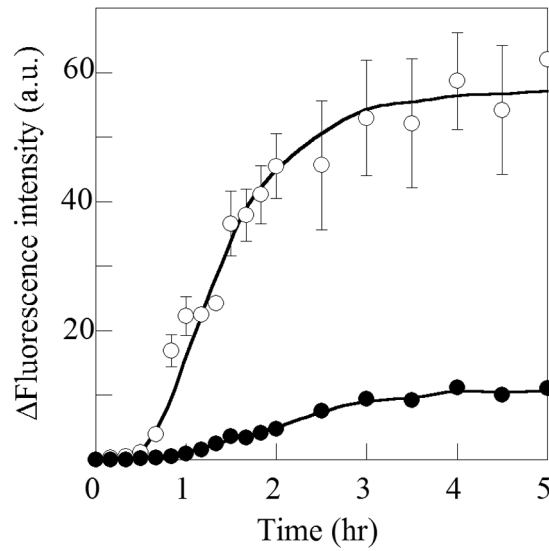

**Figure S4.** Fluorescence assay to analyze the effect of the  $\alpha$ AC(71-88) amyloid on the fibril formation of A $\beta$ (1-40). ThT fluorescence intensity 100  $\mu$ g/ml A $\beta$ (1-40) in 50 mM sodium phosphate (pH 7.5) with 100 mM NaCl was monitored at 37°C with shaking at a rotation rate of 200 rpm. ○, no additives; ●, + 400  $\mu$ g/ml  $\alpha$ AC(71-88) amyloid. The time trace of ThT fluorescence of the solution of A $\beta$ (1-40) showed a characteristic sigmoidal curve with a lag phase of ~1 hr followed by a rapid fibril growth phase.
